# Supplementary material
Source: Springer Nature journal article supplement (https://www.springermedizin.de/resource/supplementary/12936_2009_1136_MOESM6_ESM.pdf/9549948)

### A. MUNSAN

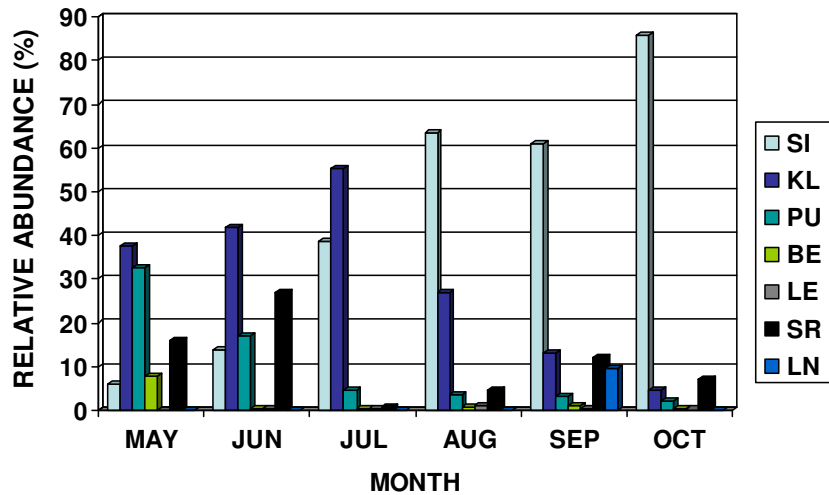

### B. JINBO

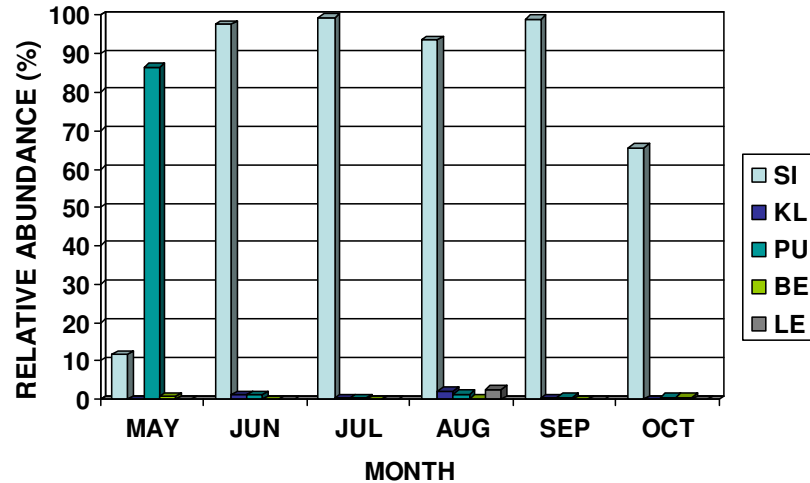

### C. HAYANG

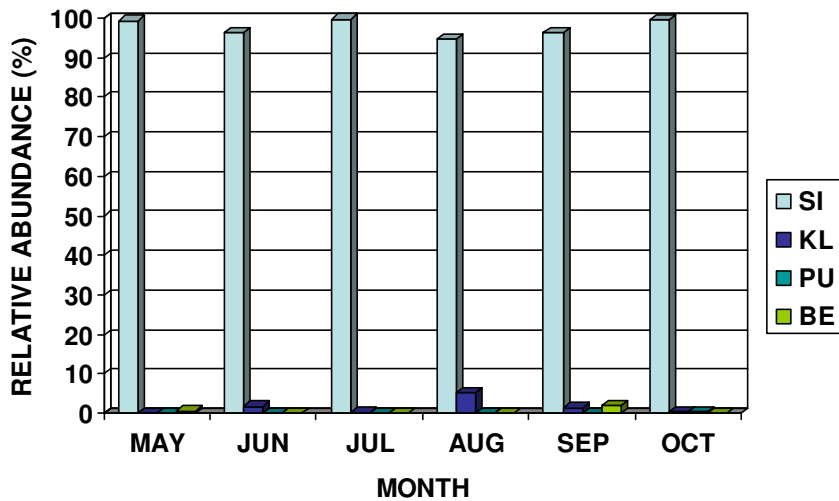

Supplement: MOESM6 [file 9549948]
